# Supplementary material for: Efficacy of mycophenolate mofetil as a remission induction therapy in antineutrophil cytoplasmic antibody-associated vasculitis—a meta-analysis
Source: PubMed Central journal article supplement — RMD Open. 2020 Apr 29;6(1):e001195. doi: 10.1136/rmdopen-2020-001195 (PMC7299518; doi:10.1136/rmdopen-2020-001195), 2020-04-29
Supplement: rmdopen-2020-001195s002.pdf [file rmdopen-2020-001195s002.pdf]

|          | Randomization process | Deviations from intended interventions | Missing outcome data | Measurement of the outcome | Selection of the reported result | Overall |               |
|----------|-----------------------|----------------------------------------|----------------------|----------------------------|----------------------------------|---------|---------------|
| Tuin J   | +                     | +                                      | +                    | +                          | +                                | +       | Low risk      |
| Jones RB | +                     | +                                      | +                    | +                          | +                                | ?       | Some concerns |
| Han F    | +                     | +                                      | +                    | +                          | +                                | "       | High risk     |
| Hu W     | ?                     | +                                      | +                    | +                          | +                                | ?       |               |
