# Supplementary figures and images for: Efficacy of mycophenolate mofetil as a remission induction therapy in antineutrophil cytoplasmic antibody-associated vasculitis—a meta-analysis
Source: PubMed Central journal article supplement — RMD Open. 2020 Apr 29;6(1):e001195. doi: 10.1136/rmdopen-2020-001195 (PMC7299518; doi:10.1136/rmdopen-2020-001195), 2020-04-29

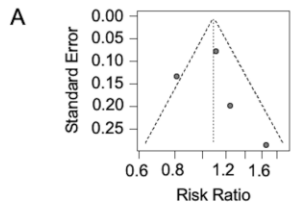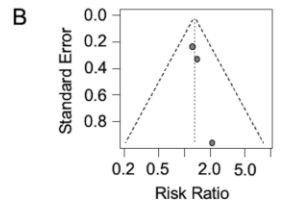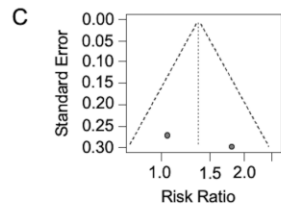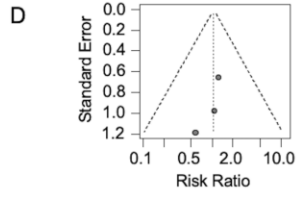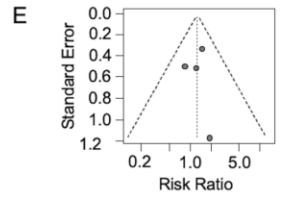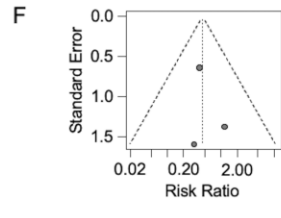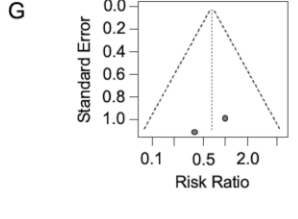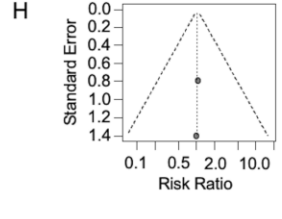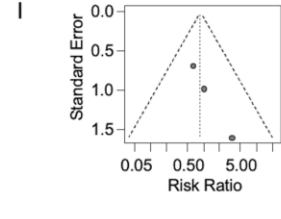

Supplement: rmdopen-2020-001195s001.pdf [file rmdopen-2020-001195s001.pdf]

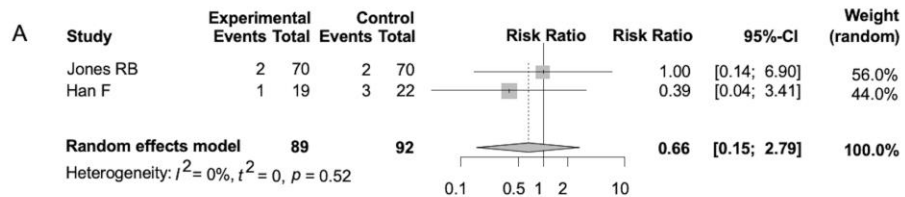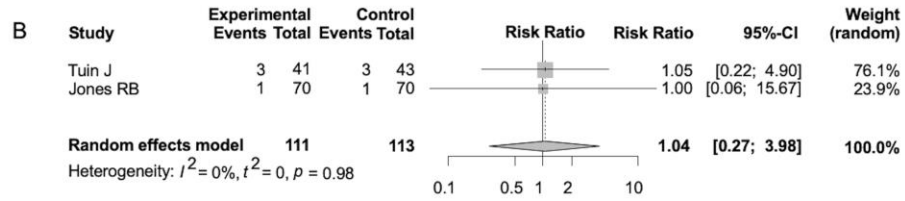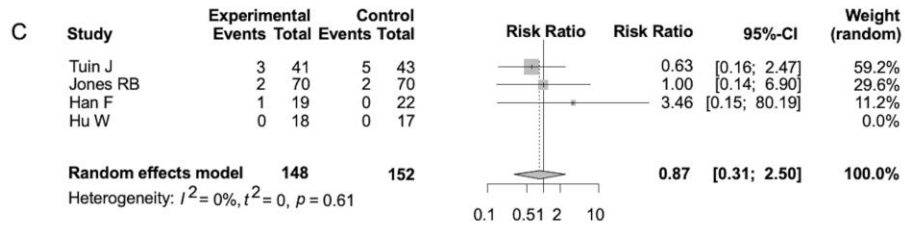

Supplement: rmdopen-2020-001195s003.pdf [file rmdopen-2020-001195s003.pdf]
